# Supplementary material
Source: MDPI journal article supplement (https://www.mdpi.com/2073-4395/15/11/2463)
Supplement: s1 [file agronomy-3898883-supplementary.pdf › agronomy-3898883-supplementary.pdf]

**Table S1.** Total annual cost for each treatment

| Year | Cost of each component                          | N <sub>G</sub> | A <sub>L</sub> | A <sub>G</sub> | A <sub>L+G</sub> | P <sub>L</sub> | P <sub>G</sub> | P <sub>L+G</sub> |
|------|-------------------------------------------------|----------------|----------------|----------------|------------------|----------------|----------------|------------------|
| 2021 | Annual fertilizer purchase expenditure (CNY/ha) | 3011           | 3011           | 3011           | 3011             | 3011           | 3011           | 3011             |
|      | Annual seed purchase expenditure (CNY/ha)       | 0              | 600            | 1500           | 1470             | 190            | 400            | 413              |
|      | Annual labor employment cost (CNY/ha)           | 47000          | 57000          | 57000          | 57000            | 57000          | 57000          | 57000            |
|      | <b>Total input cost (CNY/ha)</b>                | <b>50011</b>   | <b>60611</b>   | <b>61511</b>   | <b>61481</b>     | <b>60201</b>   | <b>60411</b>   | <b>60424</b>     |
| 2022 | Annual fertilizer purchase expenditure (CNY/ha) | 3011           | 3011           | 3011           | 3011             | 3011           | 3011           | 3011             |
|      | Annual seed purchase expenditure (CNY/ha)       | 0              | 600            | 1500           | 1470             | 0              | 0              | 0                |
|      | Annual labor employment cost (CNY/ha)           | 47000          | 57000          | 57000          | 57000            | 52000          | 52000          | 52000            |
|      | <b>Total input cost (CNY/ha)</b>                | <b>50011</b>   | <b>60611</b>   | <b>61511</b>   | <b>61481</b>     | <b>55011</b>   | <b>55011</b>   | <b>55011</b>     |
| 2023 | Annual fertilizer purchase expenditure (CNY/ha) | 3011           | 3011           | 3011           | 3011             | 3011           | 3011           | 3011             |
|      | Annual seed purchase expenditure (CNY/ha)       | 0              | 600            | 1500           | 1470             | 0              | 0              | 0                |
|      | Annual labor employment cost (CNY/ha)           | 47000          | 57000          | 57000          | 57000            | 52000          | 52000          | 52000            |
|      | <b>Total input cost (CNY/ha)</b>                | <b>50011</b>   | <b>60611</b>   | <b>61511</b>   | <b>61481</b>     | <b>55011</b>   | <b>55011</b>   | <b>55011</b>     |
| 2024 | Annual fertilizer purchase expenditure (CNY/ha) | 3011           | 3011           | 3011           | 3011             | 3011           | 3011           | 3011             |
|      | Annual seed purchase expenditure (CNY/ha)       | 0              | 600            | 1500           | 1470             | 0              | 0              | 0                |
|      | Annual labor employment cost (CNY/ha)           | 47000          | 57000          | 57000          | 57000            | 52000          | 52000          | 52000            |
|      | <b>Total input cost (CNY/ha)</b>                | <b>50011</b>   | <b>60611</b>   | <b>61511</b>   | <b>61481</b>     | <b>55011</b>   | <b>55011</b>   | <b>55011</b>     |

Price of N, P and K fertilizer is 7.48, 8.32 and 8.67 CNY/kg. Price of *Avena sativa* L., *Vicia sativa* L., *Medicago sativa* L. and *Dactylis glomerata* L. is 12, 15, 38 and 40 CNY/kg.

**Table S2.** Value division of Shannon–Wiener index  $H$  grades.

| The number | Shannon–Wiener index | Class of biodiversity | Unit value (CNY/ha) |
|------------|----------------------|-----------------------|---------------------|
| 1          | $H < 1$              | 7                     | 3000                |
| 2          | $1 \leq H < 2$       | 6                     | 5000                |
| 3          | $2 \leq H < 3$       | 5                     | 10000               |
| 4          | $3 \leq H < 4$       | 4                     | 20000               |
| 5          | $4 \leq H < 5$       | 3                     | 30000               |
| 6          | $5 \leq H < 6$       | 2                     | 40000               |
| 7          | $\geq 6$             | 1                     | 50000               |
